# Supplementary material for: Functional Ecology of Two Contrasting Freshwater Ciliated Protists in Relation to Temperature
Source: PubMed Central journal article supplement (PMC8044924; doi:10.1111/jeu.12823), 2020-12-27

## SUPPORTING INFORMATION

### Functional ecology of Two Contrasting Freshwater Ciliated Protists in Relation to Temperature by Xiaoteng Lu, Yunyi Gao, Thomas Weisse

**Table. S1.** Bacterial abundance and biomass in the experiments measured in three levels at 15°C.

**Fig. S1.** Estimated linear relationship between bacterial biomass and *Cryptomonas* biomass using the data shown in the Supplementary Table S1.

**Fig. S2.** Refitted numerical response (NR) curve with *Cryptomonas* and bacterial biomass combined (red dashed lines) and the original NR curves fitted with *Cryptomonas* biomass only (solid blue lines) of *Vorticella natans*. Red triangle symbols and blue spherical symbols mark the refitted and original plots, respectively.

**Fig. S3.** Refitted functional response (FR) curves with *Cryptomonas* and bacterial biomass combined (red dashed lines) and the original FR curves fitted with *Cryptomonas* biomass only (solid blue lines) of *Vorticella natans*. Red triangle symbols and blue spherical symbols mark the refitted and original plots, respectively.

Table. S1. Bacterial abundance and biomass in the experiments measured in three levels at 15°C.

| <i>Cryptomonas</i><br>conc. (cells mL <sup>-1</sup> ) | <i>Cryptomonas</i><br>carbon (mgC L <sup>-1</sup> ) | Bacteria conc.<br>(cells mL <sup>-1</sup> ) | Bacteria<br>carbon (mgC<br>L <sup>-1</sup> ) | <i>Cryptomonas</i> vs.<br>Bacteria carbon ratio |
|-------------------------------------------------------|-----------------------------------------------------|---------------------------------------------|----------------------------------------------|-------------------------------------------------|
| 1000                                                  | 0.03                                                | 323875                                      | 0.035                                        | <b>1:1</b>                                      |
| 15000                                                 | 0.51                                                | 608886                                      | 0.065                                        | <b>8:1</b>                                      |
| 100000                                                | 3.39                                                | 1930298                                     | 0.206                                        | <b>16:1</b>                                     |

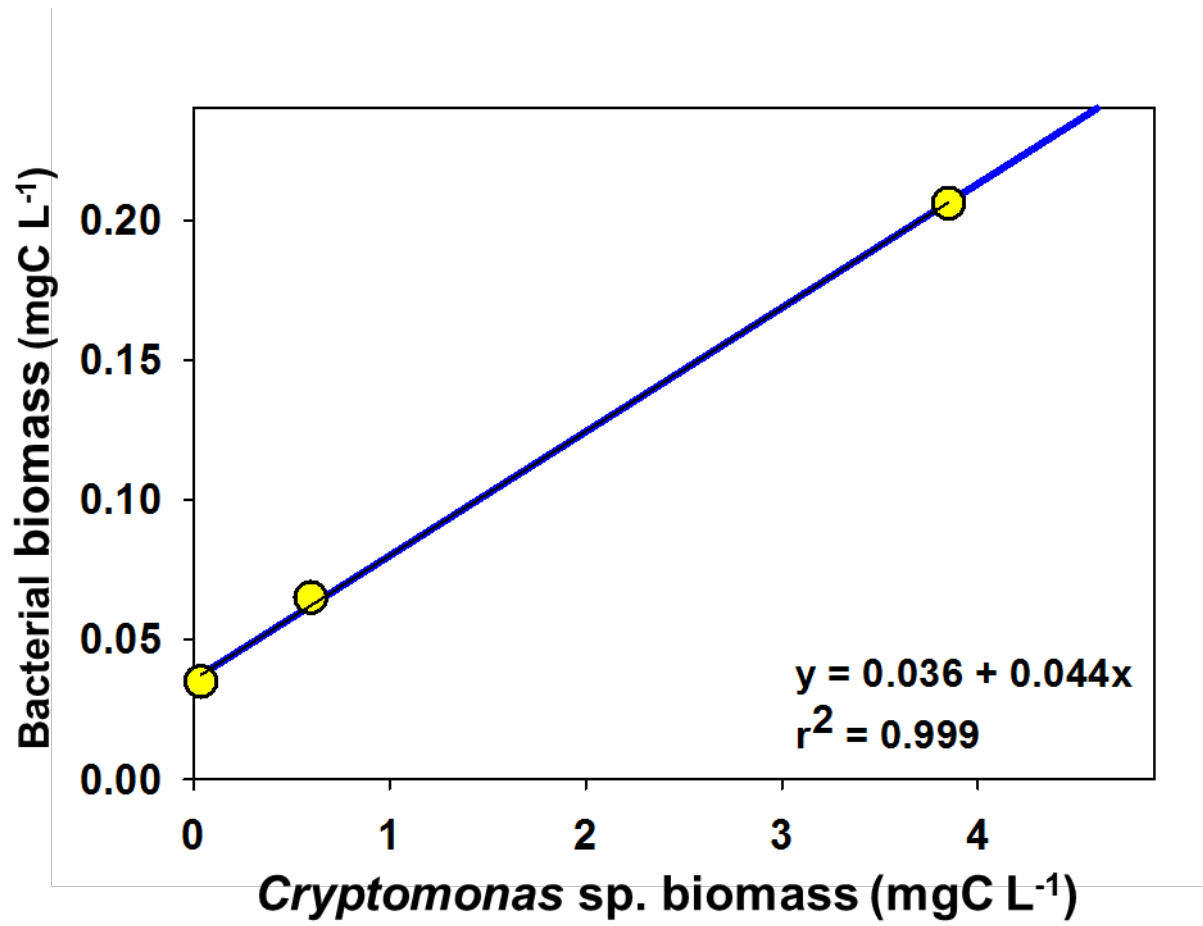

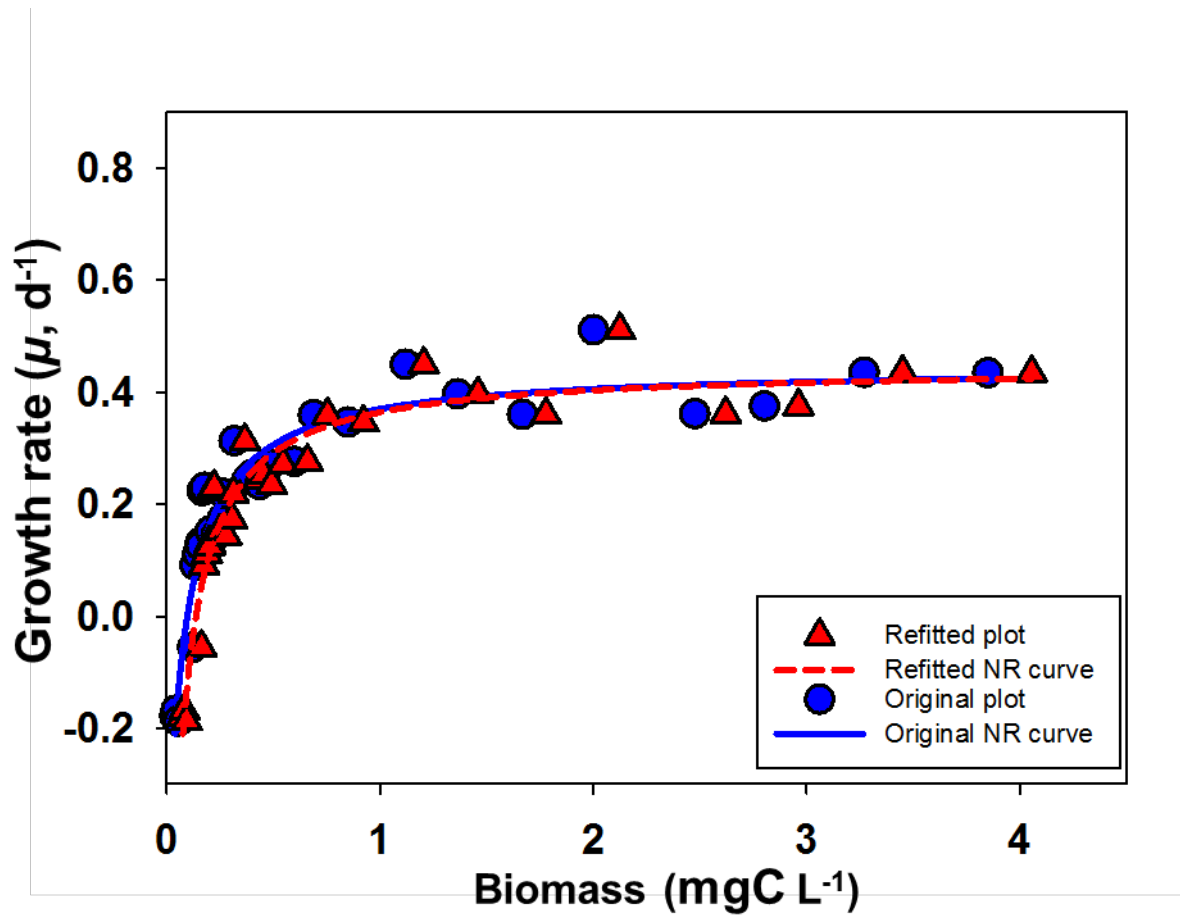

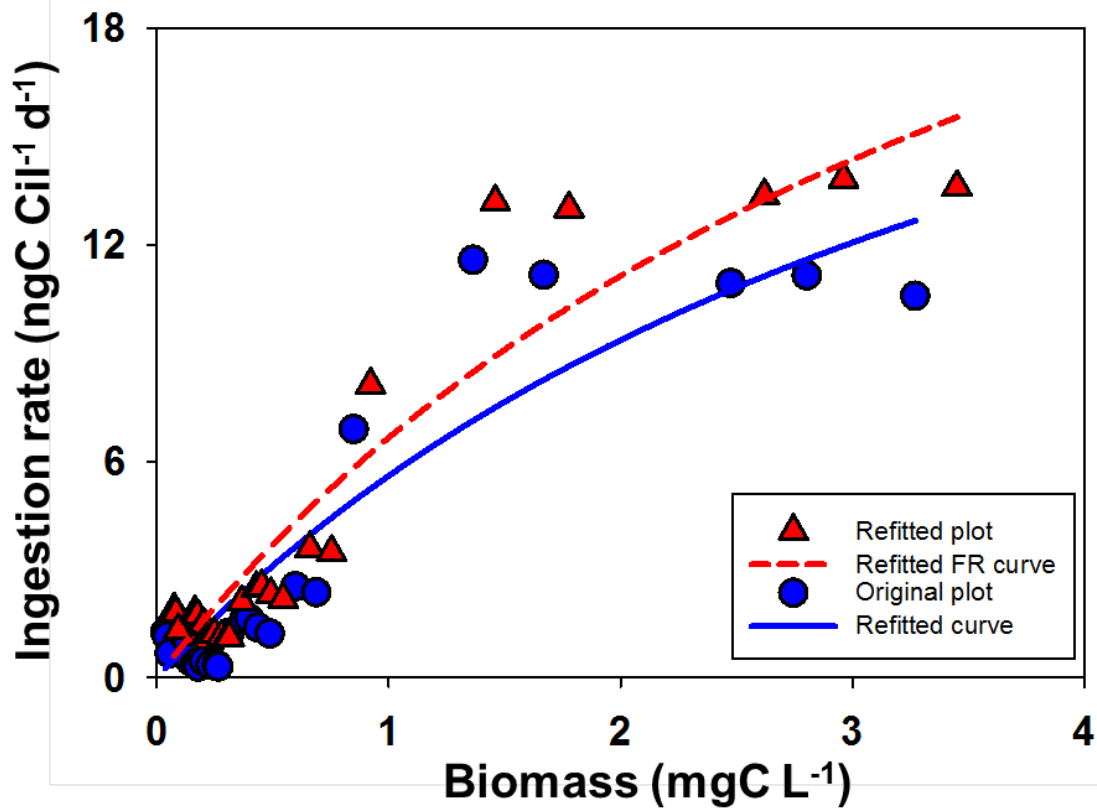

Supplement: JEU-68-0-s001.pdf [file JEU-68-0-s001.pdf]
